# Supplementary material for: Initial therapeutic results of atezolizumab plus bevacizumab for unresectable advanced hepatocellular carcinoma and the importance of hepatic functional reserve
Source: PubMed Central journal article supplement (PMC9939118; doi:10.1002/cam4.5145), 2022-08-14
Supplement: CAM4-12-2646-s001.pdf [file CAM4-12-2646-s001.pdf]

# Supplementary Figure.1

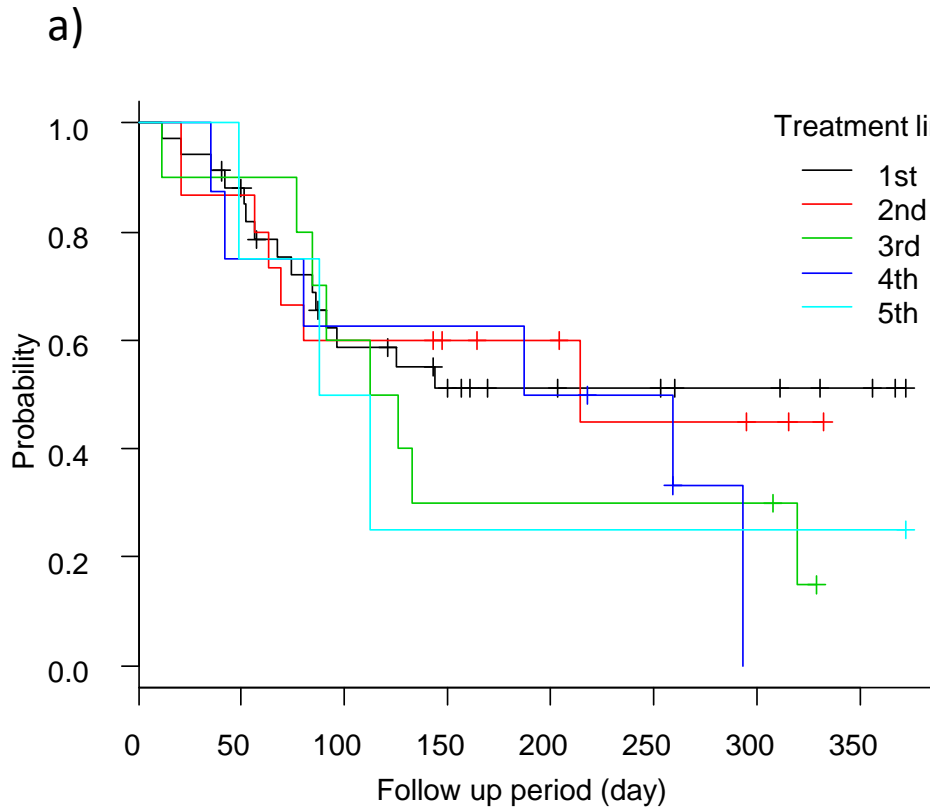

|     | Number at risk |    |     |     |     |     |     |     |
|-----|----------------|----|-----|-----|-----|-----|-----|-----|
|     | 0              | 50 | 100 | 150 | 200 | 250 | 300 | 350 |
| 1st | 34             | 29 | 17  | 13  | 8   | 7   | 5   | 3   |
| 2nd | 15             | 13 | 9   | 7   | 6   | 3   | 2   | 0   |
| 3rd | 10             | 9  | 6   | 3   | 3   | 3   | 3   | 0   |
| 4th | 8              | 6  | 5   | 5   | 4   | 3   | 0   | 0   |
| 5th | 4              | 3  | 2   | 1   | 1   | 1   | 1   | 1   |

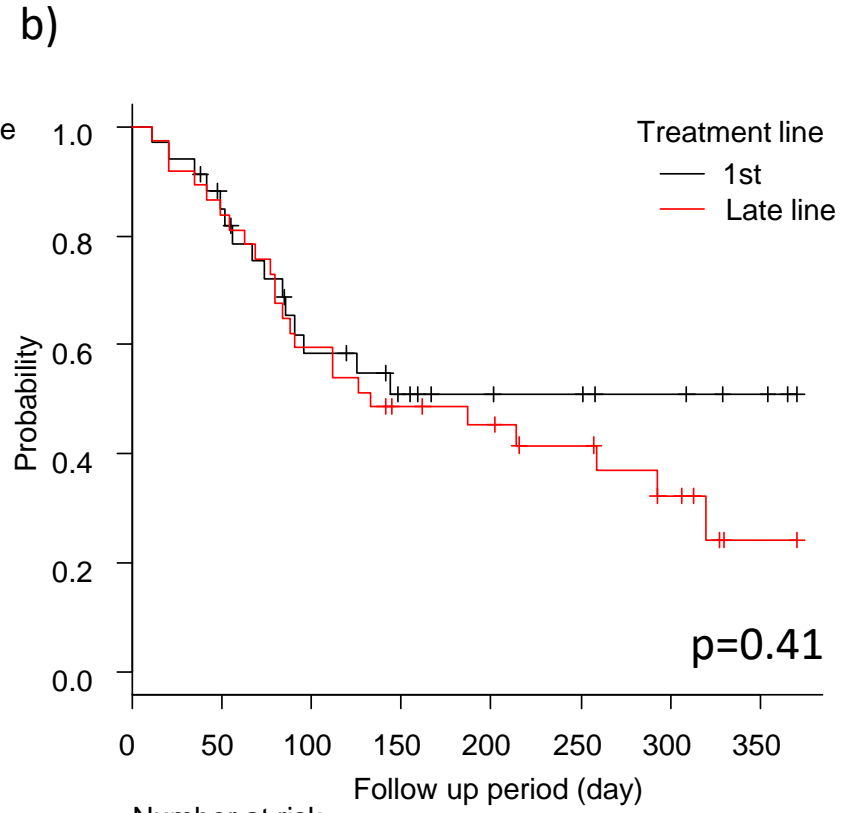

|           | Number at risk |    |     |     |     |     |     |     |  |
|-----------|----------------|----|-----|-----|-----|-----|-----|-----|--|
|           | 0              | 50 | 100 | 150 | 200 | 250 | 300 | 350 |  |
| 1st       | 34             | 27 | 17  | 12  | 8   | 7   | 5   | 3   |  |
| Late line | 37             | 31 | 22  | 16  | 14  | 10  | 6   | 1   |  |
