# Supplementary material for: Initial therapeutic results of atezolizumab plus bevacizumab for unresectable advanced hepatocellular carcinoma and the importance of hepatic functional reserve
Source: PubMed Central journal article supplement (PMC9939118; doi:10.1002/cam4.5145), 2022-08-14

Supplementary Figure.2

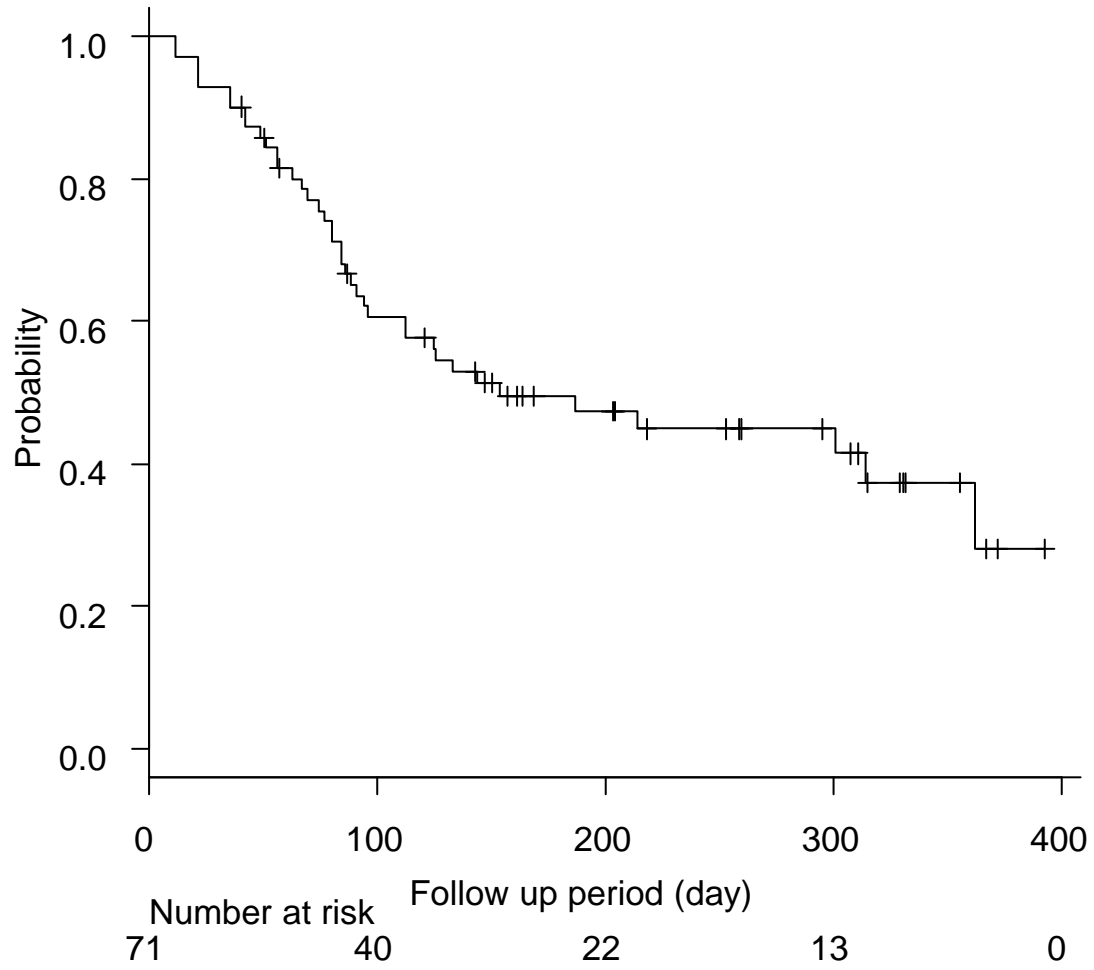

Supplement: CAM4-12-2646-s002.pdf [file CAM4-12-2646-s002.pdf]
